# Supplementary material for: Repeated evolution of soldier sub-castes suggests parasitism drives social complexity in stingless bees
Source: PubMed Central journal article supplement (PMC5431902; doi:10.1038/s41467-016-0012-y), 2017-02-23
Supplement: 41467_2016_12_MOESM1_ESM.pdf [file 41467_2016_12_MOESM1_ESM.pdf]

**Supplementary Table 1. Samples sizes, location of collection and information about the natural history of the 28 studied species.** No traffic data for both measuring periods was available for *Scaura latitarsis* due to the remoteness of the sampling location. Queen-worker dimorphism (Q-W ratio) is provided for species where information is available.

| Species                            | Nesting type | Brood comb type | Colonies | Bees | Traffic/1min | Q-W ratio | Origin of colonies            |
|------------------------------------|--------------|-----------------|----------|------|--------------|-----------|-------------------------------|
| <i>Friesella schrottkyi</i>        | cavity       | combs           | 8        | 82   | 3.3          | 1.5       | Ribeirão Preto - São Paulo    |
| <i>Frieseomelitta flavicornis</i>  | cavity       | cell cluster    | 6        | 76   | 1.2          | 2.03      | Belém - Pará                  |
| <i>Frieseomelitta longipes</i>     | cavity       | cell cluster    | 4        | 28   | 1.8          |           | Belém - Pará                  |
| <i>Frieseomelitta silvestrii</i>   | cavity       | cell cluster    | 5        | 54   | 9.0          |           | Nova Xavantina - Mato Grosso  |
| <i>Frieseomelitta varia</i>        | cavity       | cell cluster    | 6        | 86   | 10.6         | 1.3       | Ribeirão Preto - São Paulo    |
| <i>Geotrigona mombuca</i>          | ground       | combs           | 2        | 44   | 3.8          |           | Ribeirão Preto - São Paulo    |
| <i>Lestrimelitta limao</i>         | cavity       | combs           | 2        | 72   | 25.0         |           | Ribeirão Preto - São Paulo    |
| <i>Leurotrigona muelleri</i>       | cavity       | cell cluster    | 3        | 60   | 5.9          |           | Ribeirão Preto - São Paulo    |
| <i>Melipona fasciculata</i>        | cavity       | combs           | 6        | 75   | 1.8          | 1.26      | Belém - Pará                  |
| <i>Melipona flavolineata</i>       | cavity       | combs           | 5        | 61   | 2.6          | 1.34      | Belém - Pará                  |
| <i>Melipona melanoventer</i>       | cavity       | combs           | 6        | 73   | 1.8          |           | Belém - Pará                  |
| <i>Melipona scutellaris</i>        | cavity       | combs           | 5        | 39   | 1.7          | 1.3       | Ribeirão Preto - São Paulo    |
| <i>Melipona subnitida</i>          | cavity       | combs           | 2        | 48   | 0.8          | 1.2       | Mossoró - Rio Grando do Norte |
| <i>Nannotrigona testaceicornis</i> | cavity       | combs           | 4        | 102  | 10.1         | 1.74      | Ribeirão Preto - São Paulo    |
| <i>Paratrigona lineata</i>         | ground       | combs           | 2        | 46   | 7.7          |           | Ribeirão Preto - São Paulo    |
| <i>Partamona helleri</i>           | cavity       | combs           | 2        | 61   | 22.1         |           | Ribeirão Preto - São Paulo    |
| <i>Plebeia droryana</i>            | cavity       | combs           | 5        | 92   | 8.5          | 1.9       | Ribeirão Preto - São Paulo    |
| <i>Scaptotrigona bipunctata</i>    | cavity       | combs           | 2        | 94   | 32.8         | 2.09      | Ribeirão Preto - São Paulo    |
| <i>Scaptotrigona aff. depilis</i>  | cavity       | combs           | 4        | 76   | 31.6         | 1.5       | Ribeirão Preto - São Paulo    |
| <i>Scaptotrigona tubiba</i>        | cavity       | combs           | 2        | 69   | 8.0          |           | Belém - Pará                  |
| <i>Scaura latitarsis</i>           | termite nest | cell cluster    | 3        | 55   |              |           | Belém - Pará                  |
| <i>Tetragona clavipes</i>          | cavity       | combs           | 3        | 69   | 91.2         |           | Ribeirão Preto - São Paulo    |
| <i>Tetragonisca angustula</i>      | cavity       | combs           | 6        | 105  | 27.4         | 3.3       | Ribeirão Preto - São Paulo    |
| <i>Tetragonisca fiebrigi</i>       | cavity       | combs           | 6        | 123  | 33.6         |           | Santa Helena - Paraná         |
| <i>Trigona fuscipennis</i>         | cavity       | combs           | 2        | 90   | 269.5        |           | Ribeirão Preto - São Paulo    |
| <i>Trigona hypogea</i>             | cavity       | combs           | 2        | 76   | 80.0         |           | Ribeirão Preto - São Paulo    |
| <i>Trigona recursa</i>             | cavity       | combs           | 3        | 72   | 48.6         |           | Ribeirão Preto - São Paulo    |
| <i>Trigonisca nataliae</i>         | cavity       | cell cluster    | 2        | 44   | 4.5          |           | Nova Xavantina - Mato Grosso  |

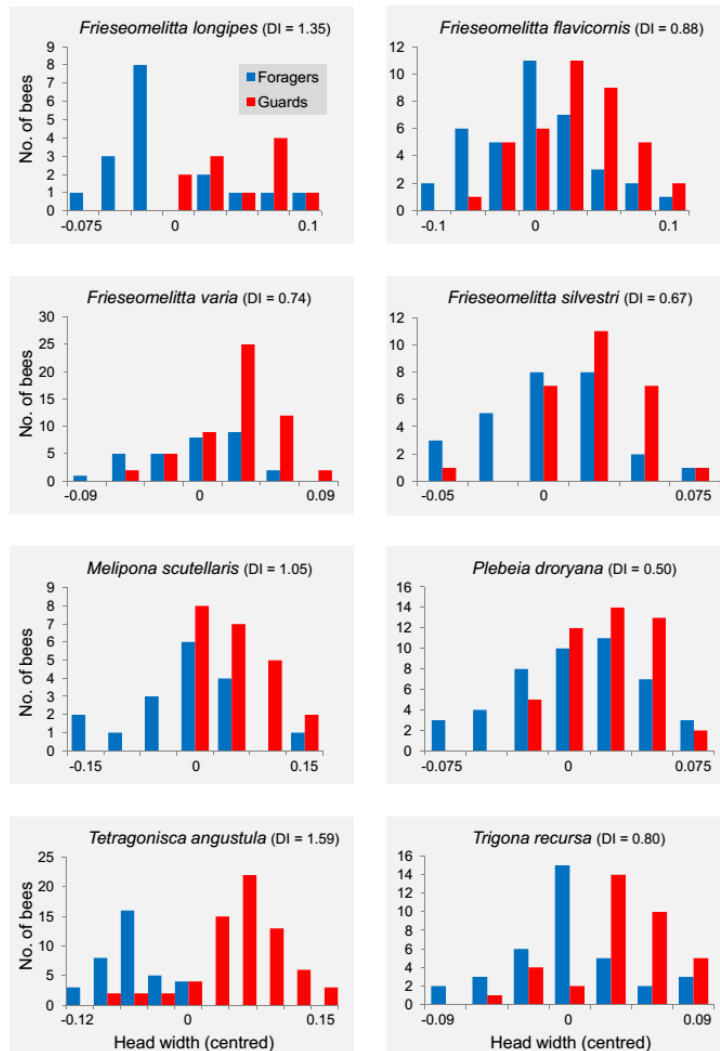

**Supplementary Figure 1. Size-frequency distribution (head width) of foragers and guards of eight species with significantly larger guards.** Head width data were centred (for each colony separately). Size distribution is bimodal in *Tetragonisca angustula* and *Frieseomelitta longipes*, indicating the existence of two distinct physical sub-castes. The DI (differentiation index) measures the degree of differentiation between guards and foragers in relation to overall worker size variation. For sample size information, please consult Supplementary Table 1.

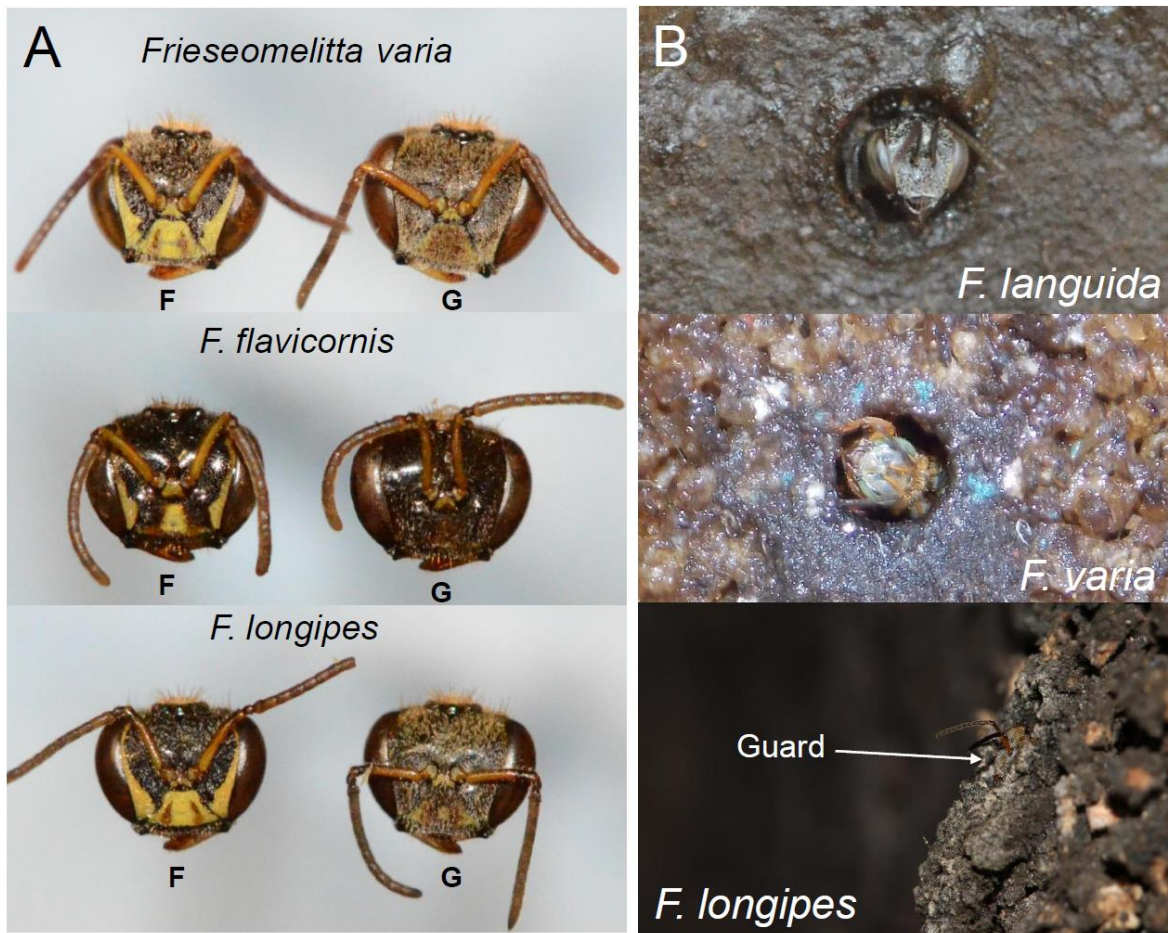

**Supplementary Figure 2.** (A) Head of guards and foragers in three different *Frieseomelitta* species. The differentiation indexes (DI) for melanisation were 1.7 in *Frieseomelitta varia* (Fig. 2c), 1.5 in *F. flavicornis* and 1.85 in *F. longipes*. These were the highest DI's we found (including DI's found for size differences), indicating the existence of two distinct colour morphs (Photos: C. Grüter). (B) *Frieseomelitta languida*, *F. varia* and *F. longipes* entrance holes. Entrance holes in *Frieseomelitta* are amongst the smallest in stingless bees. The darker species *F. languida* (and *F. silvestrii*) have darker entrances than species with lighter guards (*F. varia* or *F. longipes*). The workers cover the surface surrounding their nest entrance with sticky substances (Photos: C. Grüter and C. Menezes).
